# Supplementary material for: Global circRNA expression changes predate clinical and histological improvements of psoriasis patients upon secukinumab treatment
Source: PubMed Central journal article supplement (PMC9522259; doi:10.1371/journal.pone.0275219), 2022-09-29
Supplement: pone.0275219.s001.pdf [file pone.0275219.s001.pdf]

A

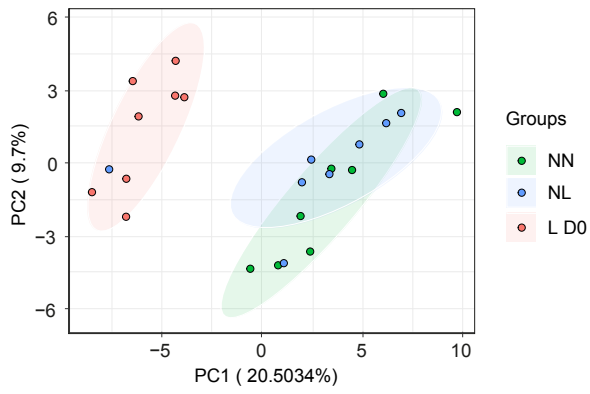

B

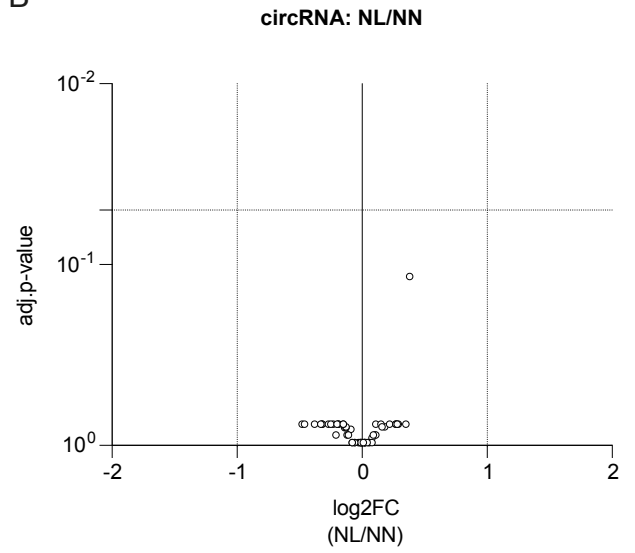

C

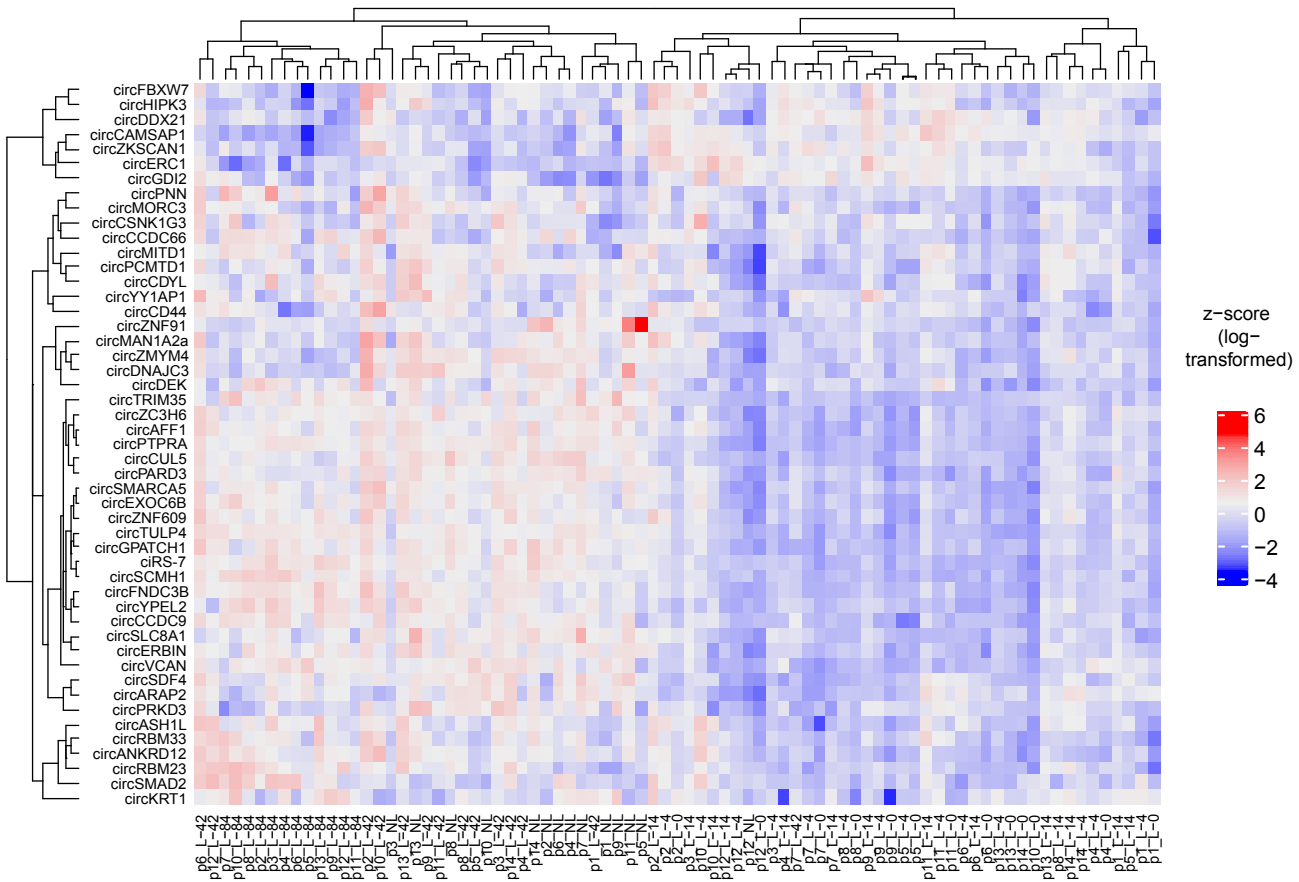

D

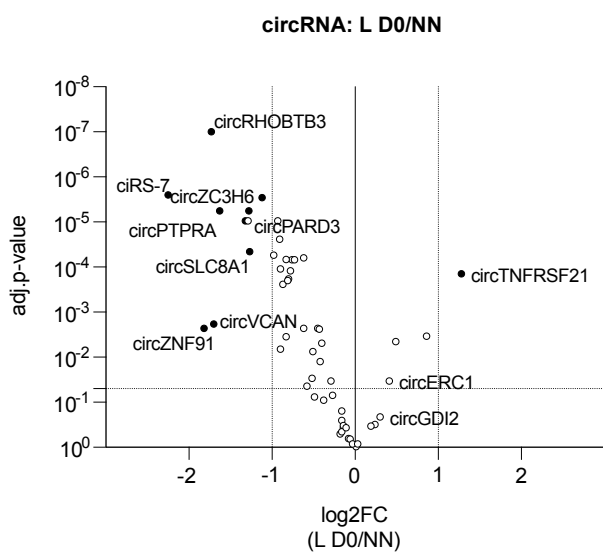

E

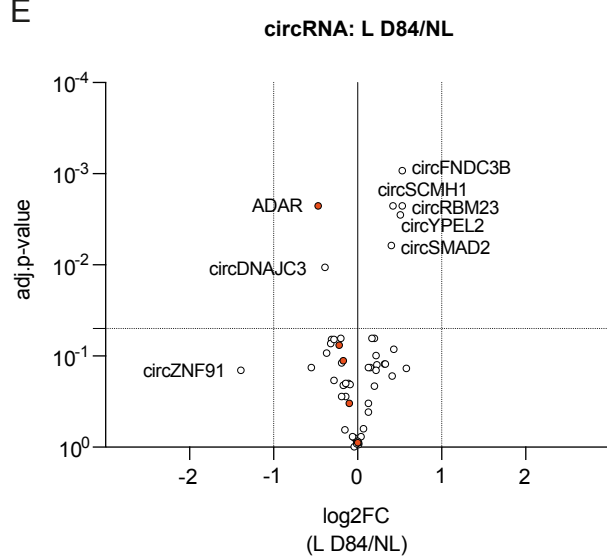

Figure S1
