# Supplementary material for: Global circRNA expression changes predate clinical and histological improvements of psoriasis patients upon secukinumab treatment
Source: PubMed Central journal article supplement (PMC9522259; doi:10.1371/journal.pone.0275219), 2022-09-29
Supplement: pone.0275219.s004.pdf [file pone.0275219.s004.pdf]

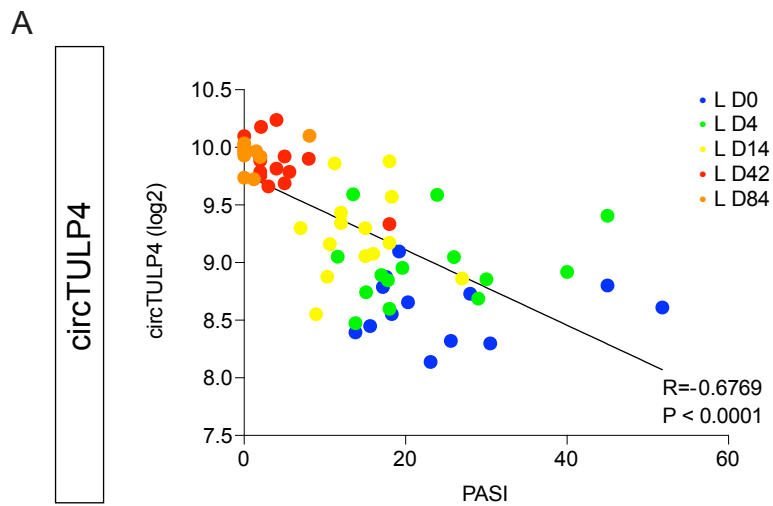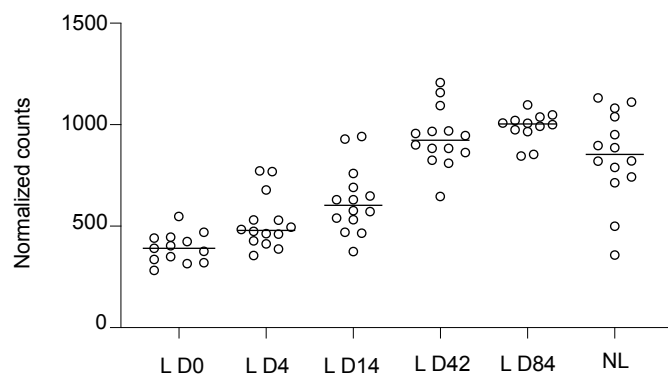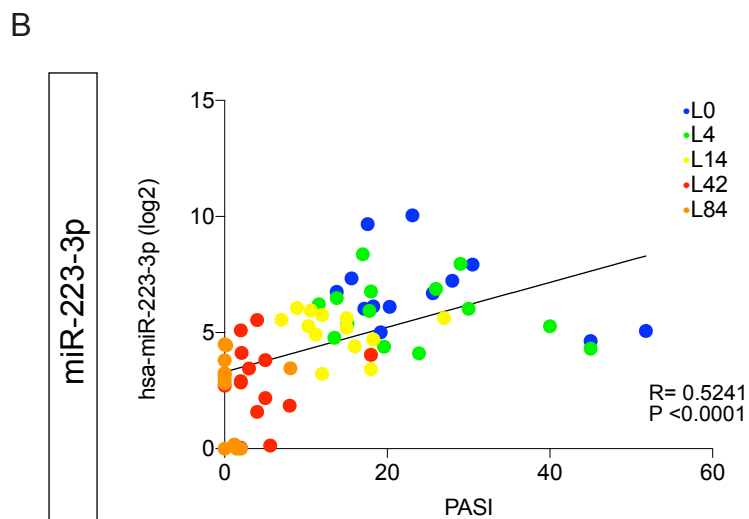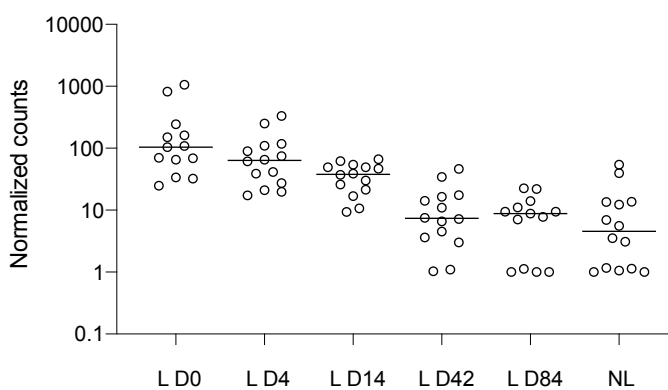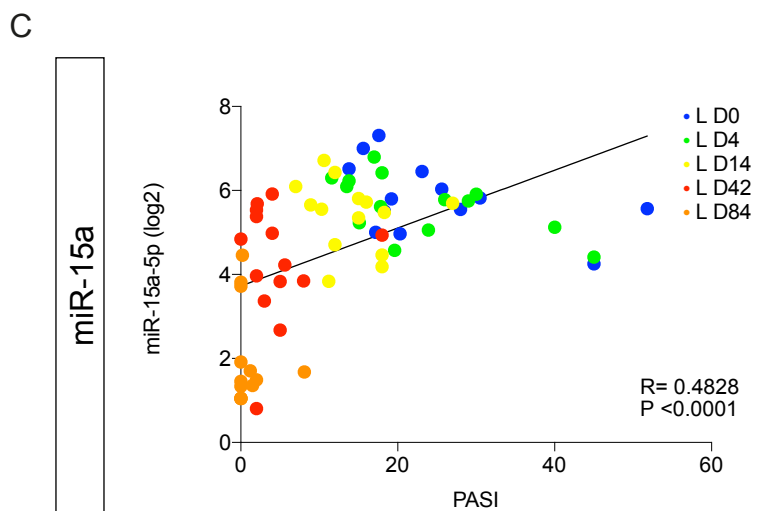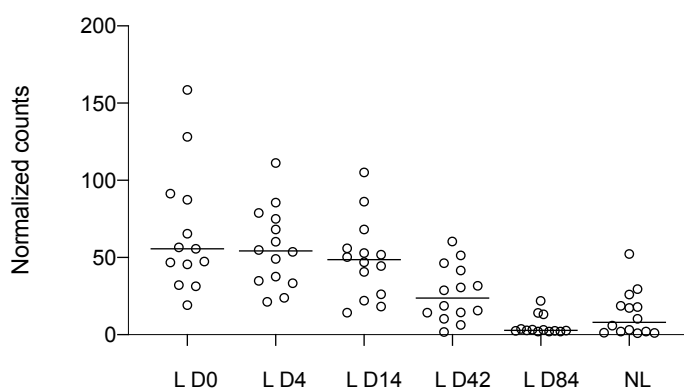

Figure S4
